# Supplementary material for: Fungal–Bacterial Networks in the Habitat of SongRong (Tricholoma matsutake) and Driving Factors of Their Distribution Rules
Source: MDPI journal article supplement (doi:10.3390/jof8060575), 2022-05-27
Supplement: s1 [file s1]

**Table S1 The dominant bacterial genera and their relative abundance in the soil of three plots**

| Samples | Genus                                                     | The relative abundance |
|---------|-----------------------------------------------------------|------------------------|
| PA      | <i>Subgroup_6</i>                                         | 4.34%                  |
|         | <i>Candidatus_Udaeobacter</i>                             | 3.57%                  |
|         | <i>Thiobacillus</i>                                       | 2.86%                  |
|         | <i>KD4-96</i>                                             | 2.27%                  |
|         | <i>Bradyrhizobium</i>                                     | 2.11%                  |
|         | <i>Allorhizobium-Neorhizobium-Pararhizobium-Rhizobium</i> | 1.63%                  |
|         | <i>Subgroup_2</i>                                         | 1.60%                  |
|         | <i>Mycobacterium</i>                                      | 1.15%                  |
|         | <i>Sphingomonas</i>                                       | 1.15%                  |
|         | <i>RB41</i>                                               | 1.04%                  |
| PB      | <i>Burkholderia-Caballeronia-Paraburkholderia</i>         | 12.62%                 |
|         | <i>Subgroup_2</i>                                         | 5.25%                  |
|         | <i>Bradyrhizobium</i>                                     | 3.26%                  |
|         | <i>Acidothermus</i>                                       | 2.50%                  |
|         | <i>Bryobacter</i>                                         | 2.48%                  |
|         | <i>Mycobacterium</i>                                      | 1.91%                  |
|         | <i>Candidatus_Solibacter</i>                              | 1.78%                  |
|         | <i>Candidatus_Udaeobacter</i>                             | 1.75%                  |
|         | <i>Roseiarcus</i>                                         | 1.70%                  |
|         | <i>AD3</i>                                                | 1.60%                  |
|         | <i>Granulicella</i>                                       | 1.48%                  |
|         | <i>Candidatus_Xiphinematobacter</i>                       | 1.34%                  |
|         | <i>Subgroup_6</i>                                         | 1.30%                  |
|         | <i>Conexibacter</i>                                       | 1.22%                  |
| PC      | <i>Subgroup_2</i>                                         | 4.99%                  |

|                                                   |       |
|---------------------------------------------------|-------|
| <i>Bradyrhizobium</i>                             | 3.96% |
| <i>Subgroup_6</i>                                 | 3.53% |
| <i>Burkholderia-Caballeronia-Paraburkholderia</i> | 3.18% |
| <i>Candidatus_Udaeobacter</i>                     | 2.63% |
| <i>Mycobacterium</i>                              | 2.54% |
| <i>Bryobacter</i>                                 | 2.28% |
| <i>Acidothermus</i>                               | 1.62% |
| <i>Candidatus_Solibacter</i>                      | 1.45% |
| <i>AD3</i>                                        | 1.38% |
| <i>KD4-96</i>                                     | 1.38% |
| <i>Sphingomonas</i>                               | 1.38% |
| <i>RB41</i>                                       | 1.18% |
| <i>IMCC26256</i>                                  | 1.10% |
| <i>Conexibacter</i>                               | 1.03% |
| <i>Roseiarcus</i>                                 | 1.01% |

---

Note: PA, the soil sample from the plot A (132°3'2.35"E, 46°7'20.19"N, 230m asl); PB, soil sample from the plot B (132°3'2.35"E, 46°7'20.19"N, 230m asl); PC, soil sample from the plot C (129°39'52.70"E, 42°33'31.75"N, 380 m asl).
