# Supplementary material for: Fungal–Bacterial Networks in the Habitat of SongRong (Tricholoma matsutake) and Driving Factors of Their Distribution Rules
Source: MDPI journal article supplement (doi:10.3390/jof8060575), 2022-05-27
Supplement: s1 [file s1]

**Table S3 The spearman correlation analysis of the relative abundance of *Tricholoma* with other fungi in the habitat soil**

| <b>Fungi genus in soil</b> | <b>Spearman correlation coefficient (r)</b> | <b>Significance(p)</b> |
|----------------------------|---------------------------------------------|------------------------|
| <i>Umbelopsis</i>          | 0.946                                       | 0                      |
| <i>Penicillium</i>         | 0.919                                       | 0                      |
| <i>Trichoderma</i>         | 0.809                                       | 0                      |
| <i>Solicoccozyma</i>       | 0.78                                        | 0                      |
| <i>Geomyces</i>            | 0.749                                       | 0                      |
| <i>Mucor</i>               | 0.73                                        | 0.001                  |
| <i>Apiotrichum</i>         | 0.715                                       | 0.001                  |
| <i>Leptodontidium</i>      | 0.706                                       | 0.001                  |
| <i>Gibberella</i>          | 0.694                                       | 0.001                  |
| <i>Saitozyma</i>           | 0.692                                       | 0.001                  |
| <i>Bifiguratus</i>         | 0.676                                       | 0.002                  |
| <i>Pseudogymnoascus</i>    | 0.661                                       | 0.003                  |
| <i>Cutaneotrichosporon</i> | 0.659                                       | 0.003                  |
| <i>Absidia</i>             | 0.658                                       | 0.003                  |
| <i>Dasyscypha</i>          | 0.649                                       | 0.004                  |
| <i>Trichocladium</i>       | 0.631                                       | 0.005                  |
| <i>Pseudotomentella</i>    | 0.609                                       | 0.007                  |
| <i>Cladophialophora</i>    | 0.607                                       | 0.008                  |
| <i>Vanrija</i>             | 0.602                                       | 0.008                  |
| <i>Russula</i>             | -0.832                                      | 0.001                  |
| <i>Leotia</i>              | -0.781                                      | 0                      |
| <i>Cortinarius</i>         | -0.717                                      | 0.013                  |
| <i>Inocybe</i>             | -0.71                                       | 0.001                  |
| <i>Trechispora</i>         | -0.695                                      | 0.001                  |
| <i>Ilyonectria</i>         | -0.695                                      | 0.001                  |

|                          |        |       |
|--------------------------|--------|-------|
| <i>Entoloma</i>          | -0.666 | 0.003 |
| <i>Cylindrosympodium</i> | -0.638 | 0.004 |
| <i>Clitocybe</i>         | -0.617 | 0.006 |
