# Supplementary material for: Fungal–Bacterial Networks in the Habitat of SongRong (Tricholoma matsutake) and Driving Factors of Their Distribution Rules
Source: MDPI journal article supplement (doi:10.3390/jof8060575), 2022-05-27
Supplement: s1 [file s1]

**Table S5 Statistical tables of metabolic pathways based on MetaCyc database**

**(a) The metabolic pathways of soil bacteria in three sites**

| Level1                                          | Level2                                                                 | Abundance |
|-------------------------------------------------|------------------------------------------------------------------------|-----------|
| Biosynthesis 12                                 | Amine and Polyamine Biosynthesis                                       | 1131.4    |
|                                                 | Amino Acid Biosynthesis                                                | 35287.95  |
|                                                 | Aminoacyl-tRNA Charging                                                | 985.01    |
|                                                 | Aromatic Compound Biosynthesis                                         | 2338.04   |
|                                                 | Carbohydrate Biosynthesis                                              | 12309.05  |
|                                                 | Cell Structure Biosynthesis                                            | 6908.41   |
|                                                 | Cofactor, Prosthetic Group, Electron Carrier, and Vitamin Biosynthesis | 33059.85  |
|                                                 | Fatty Acid and Lipid Biosynthesis                                      | 22532.79  |
|                                                 | Metabolic Regulator Biosynthesis                                       | 534.24    |
|                                                 | Nucleoside and Nucleotide Biosynthesis                                 | 28217.32  |
|                                                 | Other Biosynthesis                                                     | 755.91    |
|                                                 | Secondary Metabolite Biosynthesis                                      | 4899.2    |
| Degradation/Utilization/Assimilation 16         | Alcohol Degradation                                                    | 301.95    |
|                                                 | Aldehyde Degradation                                                   | 53.34     |
|                                                 | Amine and Polyamine Degradation                                        | 2165.35   |
|                                                 | Amino Acid Degradation                                                 | 3617.67   |
|                                                 | Aromatic Compound Degradation                                          | 6899.45   |
|                                                 | C1 Compound Utilization and Assimilation                               | 3142.99   |
|                                                 | Carbohydrate Degradation                                               | 4899.44   |
|                                                 | Carboxylate Degradation                                                | 4390      |
|                                                 | Chlorinated Compound Degradation                                       | 211.47    |
|                                                 | Cofactor, Prosthetic Group, Electron Carrier Degradation               | 1.05      |
|                                                 | Degradation/Utilization/Assimilation - Other                           | 407.33    |
|                                                 | Fatty Acid and Lipid Degradation                                       | 1693.49   |
|                                                 | Inorganic Nutrient Metabolism                                          | 3960.96   |
|                                                 | Nucleoside and Nucleotide Degradation                                  | 5965.32   |
|                                                 | Polymeric Compound Degradation                                         | 1942.72   |
|                                                 | Secondary Metabolite Degradation                                       | 4169.72   |
| Detoxification2                                 | Antibiotic Resistance                                                  | 110.13    |
|                                                 | methanol oxidation to carbon dioxide                                   | 193.68    |
| Generation of Precursor Metabolite and Energy17 | 1,5-anhydrofructose degradation                                        | 45.11     |
|                                                 | Electron Transfer                                                      | 3478.55   |
|                                                 | Entner-Duodoroff Pathways                                              | 18.69     |

|                             |                                                                                      |         |
|-----------------------------|--------------------------------------------------------------------------------------|---------|
|                             | ethylmalonyl-CoA pathway                                                             | 164.95  |
|                             | Fermentation                                                                         | 9323.24 |
|                             | formaldehyde oxidation I                                                             | 37.3    |
|                             | Glycolysis                                                                           | 3060.28 |
|                             | glyoxylate cycle                                                                     | 913.46  |
|                             | isopropanol biosynthesis                                                             | 256.18  |
|                             | methyl ketone biosynthesis                                                           | 195.58  |
|                             | methylasspartate cycle                                                               | 100.59  |
|                             | Pentose Phosphate Pathways                                                           | 2738.17 |
|                             | Photosynthesis                                                                       | 1890.84 |
|                             | Respiration                                                                          | 3563.85 |
|                             | superpathway of glycolysis and<br>Entner-Doudoroff                                   | 931.8   |
|                             | superpathway of glycolysis, pyruvate<br>dehydrogenase, TCA, and glyoxylate<br>bypass | 975.15  |
|                             | TCA cycle                                                                            | 8156.17 |
| Glycan Pathways2            | Glycan Biosynthesis                                                                  | 776.92  |
|                             | Glycan Degradation                                                                   | 1080.88 |
| Macromolecule Modification2 | Nucleic Acid Processing                                                              | 1476.53 |
|                             | Protein Modification                                                                 | 0.01    |
| Metabolic Clusters10        | L-glutamate and L-glutamine biosynthesis                                             | 481.04  |
|                             | O-antigen building blocks biosynthesis (E.<br>coli)                                  | 1065.07 |
|                             | phospholipases                                                                       | 16.89   |
|                             | pyrimidine deoxyribonucleotide<br>phosphorylation                                    | 991.8   |
|                             | pyrimidine deoxyribonucleotides<br>biosynthesis from CTP                             | 6.39    |
|                             | pyrimidine deoxyribonucleotides de novo<br>biosynthesis I                            | 1008.79 |
|                             | pyrimidine deoxyribonucleotides de novo<br>biosynthesis III                          | 518.52  |
|                             | pyrimidine deoxyribonucleotides de novo<br>biosynthesis IV                           | 4.48    |
|                             | superpathway of L-aspartate and<br>L-asparagine biosynthesis                         | 423.49  |
|                             | tRNA charging                                                                        | 985.01  |

(b) The metabolic pathways of soil fungi in three sites

| Level1                                         | Level2                                                                 | Abundance |
|------------------------------------------------|------------------------------------------------------------------------|-----------|
| Biosynthesis7                                  | Amino Acid Biosynthesis                                                | 3105.23   |
|                                                | Aminoacyl-tRNA Charging                                                | 914.9     |
|                                                | Carbohydrate Biosynthesis                                              | 2374.26   |
|                                                | Cofactor, Prosthetic Group, Electron Carrier, and Vitamin Biosynthesis | 4611.78   |
|                                                | Fatty Acid and Lipid Biosynthesis                                      | 2433.44   |
|                                                | Nucleoside and Nucleotide Biosynthesis                                 | 8015.38   |
|                                                | Secondary Metabolite Biosynthesis                                      | 1629.24   |
| Degradation/Utilization/Assimilation7          | Amino Acid Degradation                                                 | 461.18    |
|                                                | C1 Compound Utilization and Assimilation                               | 684.31    |
|                                                | Carbohydrate Degradation                                               | 1126.14   |
|                                                | Degradation/Utilization/Assimilation - Other                           | 736.47    |
|                                                | Fatty Acid and Lipid Degradation                                       | 2529.4    |
|                                                | Inorganic Nutrient Metabolism                                          | 1218.49   |
|                                                | Nucleoside and Nucleotide Degradation                                  | 859.27    |
| Generation of Precursor Metabolite and Energy9 | chitin degradation to ethanol                                          | 400.58    |
|                                                | Electron Transfer                                                      | 5845.37   |
|                                                | Fermentation                                                           | 1399.32   |
|                                                | Glycolysis                                                             | 680.77    |
|                                                | glyoxylate cycle                                                       | 1314.64   |
|                                                | methyl ketone biosynthesis                                             | 808.45    |
|                                                | Pentose Phosphate Pathways                                             | 1758.79   |
|                                                | Respiration                                                            | 5845.37   |
| Glycan Pathways1                               | TCA cycle                                                              | 1051.59   |
|                                                | Glycan Biosynthesis                                                    | 785.24    |
| Metabolic Clusters5                            | phospholipases                                                         | 51.14     |
|                                                | pyrimidine deoxyribonucleotide phosphorylation                         | 693.88    |
|                                                | pyrimidine deoxyribonucleotides biosynthesis from CTP                  | 423.63    |
|                                                | pyrimidine deoxyribonucleotides de novo biosynthesis I                 | 852.93    |
|                                                | tRNA charging                                                          | 914.9     |
