# Supplementary material for: Fungal–Bacterial Networks in the Habitat of SongRong (Tricholoma matsutake) and Driving Factors of Their Distribution Rules
Source: MDPI journal article supplement (doi:10.3390/jof8060575), 2022-05-27
Supplement: s1 [file s1]

**Table S4 The spearman correlation analysis of the relative abundance of *Tricholoma* with bacteria genera in the habitat soil**

| <b>Bacteria genus in soil</b>                     | <b>Spearman correlation coefficient (r)</b> | <b>Significance (p)</b> |
|---------------------------------------------------|---------------------------------------------|-------------------------|
| <i>Terracidiphilus</i>                            | 0.875                                       | 0.000                   |
| <i>Plot4-2H12</i>                                 | 0.872                                       | 0.000                   |
| <i>Burkholderia-Caballeronia-Paraburkholderia</i> | 0.866                                       | 0.000                   |
| <i>Candidatus_Koribacter</i>                      | 0.854                                       | 0.000                   |
| <i>Acidiphilium</i>                               | 0.849                                       | 0.000                   |
| <i>Mucilaginibacter</i>                           | 0.843                                       | 0.000                   |
| <i>Jatrophihabitans</i>                           | 0.826                                       | 0.000                   |
| <i>Edaphobacter</i>                               | 0.816                                       | 0.000                   |
| <i>GAS113</i>                                     | 0.8                                         | 0.000                   |
| <i>1174-901-12</i>                                | 0.796                                       | 0.000                   |
| <i>Cupriavidus</i>                                | 0.794                                       | 0.000                   |
| <i>Heliimonas</i>                                 | 0.768                                       | 0.000                   |
| <i>Inquilinus</i>                                 | 0.746                                       | 0.000                   |
| <i>Acidocella</i>                                 | 0.733                                       | 0.001                   |
| <i>Sporichthya</i>                                | 0.724                                       | 0.001                   |
| <i>Coxiella</i>                                   | 0.723                                       | 0.001                   |
| <i>Gemmatirosa</i>                                | 0.718                                       | 0.001                   |
| <i>Rhodanobacter</i>                              | 0.708                                       | 0.001                   |
| <i>Actinoplanes</i>                               | 0.704                                       | 0.001                   |
| <i>Crossiella</i>                                 | 0.687                                       | 0.002                   |
| <i>Kutzneria</i>                                  | 0.681                                       | 0.002                   |
| <i>Acidotherrmus</i>                              | 0.68                                        | 0.002                   |
| <i>Acidicapsa</i>                                 | 0.679                                       | 0.002                   |

|                                                     |        |       |
|-----------------------------------------------------|--------|-------|
| <i>Legionella</i>                                   | 0.679  | 0.002 |
| <i>Bradyrhizobium</i>                               | 0.676  | 0.002 |
| <i>Candidatus_Berkiella</i>                         | 0.672  | 0.002 |
| <i>Labrys</i>                                       | 0.67   | 0.002 |
| <i>Ktedonobacter</i>                                | 0.667  | 0.002 |
| <i>Roseiarcus</i>                                   | 0.662  | 0.003 |
| <i>bacterium_Ellin6515</i>                          | 0.652  | 0.003 |
| <i>Pedosphaera</i>                                  | 0.65   | 0.004 |
| <i>bacterium_Ellin516</i>                           | 0.65   | 0.003 |
| <i>Nevskia</i>                                      | 0.648  | 0.004 |
| <i>Candidatus_Solibacter</i>                        | 0.645  | 0.004 |
| <i>Acidipila</i>                                    | 0.63   | 0.005 |
| <i>Aquicella</i>                                    | 0.628  | 0.005 |
| <i>Granulicella</i>                                 | 0.626  | 0.005 |
| <i>bacterium_enrichmentculturecloneauto67_4W</i>    | 0.622  | 0.006 |
| <i>bacterium_enrichmentculturecloneheteroA49_4W</i> | 0.616  | 0.006 |
| <i>Occallatibacter</i>                              | 0.614  | 0.007 |
| <i>Mycobacterium</i>                                | 0.603  | 0.008 |
| <i>Actinospica</i>                                  | 0.603  | 0.008 |
| <hr/>                                               |        |       |
| <i>Phyllobacterium</i>                              | -0.835 | 0     |
| <i>Pseudoxanthomonas</i>                            | -0.791 | 0     |
| <i>Streptococcus</i>                                | -0.761 | 0     |
| <i>Nitrospira</i>                                   | -0.749 | 0     |
| <i>Thermomonas</i>                                  | -0.717 | 0.001 |
| <i>Luteimonas</i>                                   | -0.655 | 0.003 |
| <i>Sphingobium</i>                                  | -0.638 | 0.004 |

|                   |        |       |
|-------------------|--------|-------|
| <i>MNDI</i>       | -0.633 | 0.005 |
| <i>Bosea</i>      | -0.632 | 0.005 |
| <i>Taibaiella</i> | -0.618 | 0.006 |
| <i>Agromyces</i>  | -0.611 | 0.007 |

---
