# Supplementary material for: Fungal–Bacterial Networks in the Habitat of SongRong (Tricholoma matsutake) and Driving Factors of Their Distribution Rules
Source: MDPI journal article supplement (doi:10.3390/jof8060575), 2022-05-27
Supplement: s1 [file s1]

**Table S2 The dominant fungal genera and species compositions of *Tricholoma***  
**(A) The dominant fungal genera and their relative abundance in the soil of three plots**

| Samples | Genus                   | The relative abundance |
|---------|-------------------------|------------------------|
| PA      | <i>Russula</i>          | 48.72%                 |
|         | <i>Cortinarius</i>      | 16.32%                 |
|         | <i>Mortierella</i>      | 11.42%                 |
|         | <i>Sebacina</i>         | 4.63%                  |
|         | <i>Tomentella</i>       | 2.51%                  |
| PB      | <i>Russula</i>          | 24.64%                 |
|         | <i>Tricholoma</i>       | 21.84%                 |
|         | <i>Umbelopsis</i>       | 13.48%                 |
|         | <i>Cortinarius</i>      | 8.26%                  |
|         | <i>Hygrophorus</i>      | 3.02%                  |
|         | <i>Sistotrema</i>       | 2.56%                  |
|         | <i>Mortierella</i>      | 2.46%                  |
|         | <i>Lactarius</i>        | 2.37%                  |
|         | <i>Penicillium</i>      | 2.02%                  |
|         | <i>Cenococcum</i>       | 1.69%                  |
|         | <i>Trichoderma</i>      | 1.34%                  |
| PC      | <i>Russula</i>          | 32.34%                 |
|         | <i>Hydnellum</i>        | 18.78%                 |
|         | <i>Mortierella</i>      | 5.10%                  |
|         | <i>Umbelopsis</i>       | 4.26%                  |
|         | <i>Delastria</i>        | 3.36%                  |
|         | <i>Sebacina</i>         | 2.53%                  |
|         | <i>Lactifluus</i>       | 2.46%                  |
|         | <i>Tricholoma</i>       | 1.87%                  |
|         | <i>Penicillium</i>      | 1.77%                  |
|         | <i>Hygrophorus</i>      | 1.49%                  |
|         | <i>Tomentella</i>       | 1.40%                  |
|         | <i>Geminibasidium</i>   | 1.34%                  |
|         | <i>Cladophialophora</i> | 1.12%                  |
|         | <i>Saitozyma</i>        | 1.00%                  |

**(B) The relative abundance of species in the genus *Tricholoma***

| Species                    | the relative abundance |         |         |
|----------------------------|------------------------|---------|---------|
|                            | PA                     | PB      | PC      |
| <i>T. equestre</i>         | 0.0000%                | 0.0000% | 0.0000% |
| <b><i>T. matsutake</i></b> | 0.0000%                | 0.4237% | 0.0001% |
| <i>T. portentosum</i>      | 0.0000%                | 0.0009% | 0.0097% |
| <i>T. saponaceum</i>       | 0.0000%                | 0.0068% | 0.0002% |

|                                |         |         |         |
|--------------------------------|---------|---------|---------|
| <i>T. stans</i>                | 0.0000% | 0.0033% | 0.0000% |
| <i>T. ustaloides</i>           | 0.0002% | 0.0005% | 0.0033% |
| Unclassified <i>Tricholoma</i> | 0.0000% | 0.0013% | 0.0019% |
| unidentified                   | 0.0000% | 0.0000% | 0.0213% |

---

Note: PA, the soil sample from the plot A (132°3'2.35"E, 46°7'20.19"N, 230m asl); PB, soil sample from the plot B (132°3'2.35"E, 46°7'20.19"N, 230m asl); PC, soil sample from the plot C (129°39'52.70"E, 42°33'31.75"N, 380 m asl).
