# Supplementary material for: Fungal–Bacterial Networks in the Habitat of SongRong (Tricholoma matsutake) and Driving Factors of Their Distribution Rules
Source: J Fungi (Basel). 2022 May 27;8(6):575. doi: 10.3390/jof8060575 (PMC9225054; doi:10.3390/jof8060575)
Supplement: Supplementary file 1 [file jof-08-00575-s001.zip]

Archive with 6 entries (6 files):
- jof-1729671-supplementary-Figure S1-S3.pdf
- jof-1729671-supplementary-Table S1.pdf
- jof-1729671-supplementary-Table S2.pdf
- jof-1729671-supplementary-Table S3.pdf
- jof-1729671-supplementary-Table S4.pdf
- jof-1729671-supplementary-Table S5 Statistical tables of metab.pdf
